# Supplementary material
Source: PubMed Central journal article supplement (PMC6311714)
Supplement: NIHMS1508797-supplement-Supplemental_Material.pdf [file NIHMS1508797-supplement-Supplemental_Material.pdf]

## SUPPLEMENTAL MATERIAL

### **Potential cardiovascular disease events prevented with adoption of the 2017 American College of Cardiology/American Heart Association blood pressure guideline**

Adam P Bress, PharmD, MS,<sup>1</sup> Lisandro D Colantonio, MD, PhD,<sup>2</sup> Richard Cooper, MD,<sup>3</sup> Holly Kramer, MD, MPH,<sup>3,4</sup> John N Booth III, PhD,<sup>2</sup> Michelle C Odden, PhD,<sup>5</sup> Kirsten Bibbins-Domingo, MD, PhD,<sup>6</sup> Daichi Shimbo, MD,<sup>7</sup> Paul K Whelton, MB, MD, MSc,<sup>8</sup> Emily B Levitan, ScD,<sup>2</sup> George Howard, DrPH,<sup>9</sup> Brandon K Bellows, PharmD, MS,<sup>10</sup> Dawn Kleindorfer, MD,<sup>11</sup> Monika M Safford, MD,<sup>12</sup> Paul Muntner, PhD,<sup>2</sup> and Andrew E Moran, MD, MPH<sup>10</sup>

1. Department of Population Health Sciences, University of Utah, Salt Lake City UT
2. Department of Epidemiology, University of Alabama at Birmingham, Birmingham AL
3. Department of Public Health Sciences, Loyola Medical Center, Maywood IL
4. Division of Nephrology and Hypertension, Loyola Medical Center, Maywood IL
5. School of Biological and Population Health Sciences, Oregon State University, Corvallis OR
6. School of Medicine, University of California, San Francisco CA
7. Department of Medicine, Division of Cardiology, Columbia University, New York NY
8. Department of Epidemiology, Tulane University, New Orleans LA
9. Department of Biostatistics, University of Alabama at Birmingham, Birmingham AL
10. Department of Medicine, Division of General Medicine, Department of Medicine, Columbia University Medical Center, New York NY
11. Department of Neurology, University of Cincinnati, Cincinnati, OH
12. Department of Medicine, Weill Cornell Medical College, New York NY

Corresponding author: Adam Bress, PharmD, MS  
University of Utah School of Medicine  
30 South, 2000 East, Salt Lake City, Utah 84112-5820  
Phone: (801)587-9119 Fax: (801) 587-8923  
[adam.bress@hsc.utah.edu](mailto:adam.bress@hsc.utah.edu)

## **Table of Contents**

### ***Supplementary Methods (pages 4-8)***

- Cardiovascular disease risk estimates: The REasons for Geographic and Racial Differences in Stroke (REGARDS) Study
- Identification of stroke, CHD, and heart failure hospitalization events in REGARDS
- Population size estimates: National Health and Nutrition Examination Surveys (NHANES)
- Quality Control of Blood-Pressure Measurement
- Categorization based on blood pressure levels and guideline recommended antihypertensive treatment
- Subgroup analyses
- Statistical analysis
- Treatment-related serious adverse events

### **Supplementary Figures (Pages 9-10)**

- Figure S1. Flow-chart of REGARDS study participants included in the current analysis to generate sub-group specific CVD risks.
- Figure S2. Flow-chart of NHANES 2011-2014 study participants included in the current analysis to generate sub-group specific US adults population size estimates.

### **Supplementary Tables (pages 11-30)**

- Table S1. Groupings of NHANES and REGARDS study participants not taking (left column) and taking (right column) antihypertensive medication according to their recommendation for pharmacological treatment initiation and intensification for comparisons between JNC7 and 2017 ACC/AHA blood pressure guideline.
- Table S2. Groupings of NHANES and REGARDS study participants not taking (left column) and taking (right column) antihypertensive medication according to their recommendation for pharmacological treatment initiation and intensification for comparisons between JNC8 Panel Member Report and 2017 ACC/AHA blood pressure guideline.
- Table S3. Blood pressure levels used to recommend antihypertensive medication, and treatment goal according to the 2017 ACC/AHA guideline, the JNC7 guideline and the JNC8 panel member report.
- Table S4. Hazard ratios for CVD events according to current SBP and SBP treatment goal used in calculations to project CVD events prevented with blood pressure guideline implementation.
- Table S5. Hazard ratios for CVD events according to current blood pressure levels and blood pressure treatment goal used in calculations to project CVD events prevented with blood pressure guideline implementation.
- Table S6. Calculations for pooled estimate of treatment-related SAEs in ACCORD-BP and SPRINT.
- Table S7. Detailed listing of treatment-related SAEs reported in SPRINT (top panel) and ACCORD-BP (bottom panel).

- Table S8. Calculations showing that given an average medication adherence of typical of BP lowering trial of about 75%, the lower bounds of our uncertainty ranges imply an effect size reflecting medication adherence as low as 28%.
- Table S9. Projected number of US adults recommended and not recommended pharmacological antihypertensive treatment, treatment-related SAEs expected under *current SBP levels*, and treatment-related SAEs potentially incurred in the next ten years in adults aged  $\geq 45$  years by achieving and maintaining 2017 ACC/AHA and JNC7 Guideline-Recommended SBP Goals.
- Table S10. Projected number of US adults recommended and not recommended pharmacological antihypertensive treatment, treatment-related SAEs expected under *current SBP levels*, and treatment-related SAEs potentially incurred in the next ten years in adults aged  $\geq 45$  years by Achieving and Maintaining 2017 ACC/AHA and JNC8 Panel Members Guideline-Recommended SBP Goals.
- Table S11. Projected number of US adults recommended and not recommended pharmacological antihypertensive treatment, CVD events expected under current BP levels, and CVD potentially prevented in the next 10 years in adults aged  $\geq 45$  years by achieving and maintaining 2017 ACC/AHA and JNC7 Guideline-Recommended BP Goals. Sensitivity analysis defining BP lowering effects based on SBP and DBP levels.
- Table S12. Projected number of US adults recommended and not recommended pharmacological antihypertensive treatment, CVD events expected under *current BP levels*, and projected CVD averted in the next 10 years in adults aged  $\geq 45$  by Achieving and Maintaining 2017 ACC/AHA and JNC7 Guideline-Recommended SBP Goals. Sensitivity analysis defining BP lowering effects based on SBP and DBP levels.
- Table S13. Characteristics of REGARDS and NHANES 2011-2014 study participants overall and among those taking and not taking antihypertensive medication
- Table S14. List of medications used to identify heart failure at baseline.
- Table S15. Covariates included in the current analysis and the method of ascertainment in the National Health and Nutrition Examination Survey, 2011-2014 and the REasons for Geographic And Racial Differences in Stroke study.

## References (Pages 31-33)

## Supplementary methods

### *Cardiovascular disease risk estimates: The REasons for Geographic and Racial Differences in Stroke (REGARDS) Study*

Requests to access the dataset from qualified researchers trained in human subject confidentiality protocols may be sent to the REGARDS study Executive Committee at [regards@uab.edu](mailto:regards@uab.edu). The REGARDS study was designed to determine reasons underlying the higher stroke mortality rate among residents of the Southeastern US compared to other US regions and among blacks compared with whites.<sup>1</sup> Coronary heart disease (CHD) events and heart failure hospitalizations are being identified and adjudicated in an ancillary study.<sup>2</sup>

Computer-assisted telephone interviews were administered by trained staff and used to collect information on each participant's age, race, gender, cigarette smoking status, medical history (e.g., stroke, myocardial infarction [MI], coronary revascularization, diabetes, and dialysis therapy, falls), impaired mobility and use of insulin and oral hypoglycemic and antihypertensive medications. Serum total and high-density lipoprotein (HDL) cholesterol, triglycerides, glucose and creatinine were measured using the blood samples collected during the study visit.<sup>3</sup>

Estimated glomerular filtration rate (eGFR) was calculated using age, race, gender, serum creatinine and the Chronic Kidney Disease Epidemiology equation.<sup>4</sup> Urinary albumin and creatinine were measured and used to calculate the albumin-to-creatinine ratio (ACR). History of cardiovascular disease (CVD) at baseline was defined as a history of stroke, MI, coronary revascularization, evidence of a previous MI on the study electrocardiogram, or use of one or more medications to treat heart failure (**Table S14**).<sup>1</sup> For participants without a history of CVD, the 10-year predicted CVD risk was calculated using the Pooled Cohort risk equations.<sup>5</sup>

Diabetes was defined as a fasting glucose  $\geq 126$  mg/dL, non-fasting glucose  $\geq 200$  mg/dL for those who did not fast (n=4,099), or self-report of a prior diagnosis of diabetes with current use of insulin or oral hypoglycemic medication. Chronic kidney disease (CKD) was defined by a self-

report of being on dialysis, an eGFR  $<60$  ml/min/1.73 m<sup>2</sup> or ACR  $\geq 30$  mg/g. Statin use was identified based on the medication inventory. Robust status was defined participants as not having a history of falls or impaired mobility at the first in-home visit.

*Identification of stroke, CHD, and heart failure hospitalization events in REGARDS*

Living REGARDS participants or proxy respondents are contacted every six months via telephone to identify suspected stroke, CHD (i.e., MI or CHD death) and heart failure hospitalization events which are subsequently reviewed using medical records. Stroke events are confirmed by a panel of neurologists following the World Health Organization definition.<sup>6</sup> Events not meeting this definition but characterized by symptoms lasting  $<24$  hours with neuroimaging consistent with acute infarct or hemorrhage are also classified as strokes. MIs and heart failure hospitalizations are confirmed by trained clinicians following published guidelines.<sup>7-9</sup> When deaths are identified, trained clinicians determine the main underlying cause of death based on interviews with next-of-kin, medical records, death certificates and autopsy reports.<sup>8, 10</sup> CVD events were defined as a non-fatal or fatal stroke, non-fatal or fatal MI, CHD death, or heart failure hospitalization. CVD events and all-cause mortality were available through December 31, 2014 for the current analysis.

*Population size estimates: National Health and Nutrition Examination Surveys (NHANES)*

NHANES is conducted by the National Center for Health Statistics of the Centers for Disease Control and Prevention with the goal of monitoring the health status of the general US adult population. For each cycle, potential participants are identified through stratified, multistage probability sampling allowing nationally representative estimates of the noninstitutionalized US adult population. NHANES data were collected through the administration of standardized questionnaires and a medical evaluation at a mobile examination clinic as precisely

described.<sup>11</sup> Covariates included in this analysis and their method of ascertainment are described in **Table S15**. There is no robustness measurement shared by both REGARDS and NHANES. Among NHANES participants, robust was defined by walking at least 0.8 m/s in the standard 20-foot walk test, a threshold based on the prior studies recommending this cut-point and because it aligned with more comprehensive assessments of frailty and discriminated between survival times. Prior research has shown that among the traditional components used to assess frailty, slow gait speed has the strongest prognostic ability.<sup>11-14</sup>

#### *Quality Control of Blood-Pressure Measurement*

Quality control for the BP measurements in REGARDS included calibration of the aneroid device by the manufacturer and monitoring of the readings for digit preference. In NHANES, quality control of blood-pressure measurement included quarterly recertification with retraining as needed, and annual retraining of all physicians. Certification required video test recognition of Korotkoff sounds and performing measurements on volunteers. Participants who responded affirmatively to both of the questions “Have you ever been told by a doctor or other healthcare professional that you had hypertension, also called high blood pressure?” and “Are you now taking prescribed medication for high blood pressure?” were considered to be taking antihypertensive medication.

#### *Categorization based on blood pressure levels and guideline recommended antihypertensive treatment*

For the main analysis, we only used the systolic blood pressure (SBP) level because the Bundy et al. meta-analysis provided hazard ratios in SBP categories only.<sup>15</sup> To our knowledge, no

other meta-analysis of blood pressure lowering randomized trials provides hazard ratios for cardiovascular disease events with incrementally lower diastolic blood pressure (DBP) achieved. In order to include treatment benefits for the small population segment with isolated diastolic hypertension (i.e., raised DBP but normal range SBP) and those with more severely raised DBP placing them in a higher hypertension stage than would their SBP, sensitivity analyses were conducted using the higher hypertension stage, whether based on SBP or DBP, to assign treatment effects of BP lowering (**Table S4**).

#### *Subgroup analyses*

We acknowledge that investigating subgroups may yield unstable estimates of population sizes given the sample size of NHANES 2011-2014. To address this limitation, in all subgroup analyses we collapsed the micro-strata of BP levels (i.e., groupings by 5 mmHg bins) within broad treatment groups and calculated the mean SBP within the collapsed groups. The mean SBP served as the baseline SBP from **Table S4** below to assign risk reductions for CVD events with treatment to goal BP.

#### *Statistical analysis*

We calculated characteristics of eligible NHANES and REGARDS participants separately, overall and among those taking and not taking antihypertensive medication (**Table S13**).

NHANES sampling weights were used to calculate US population size estimates. These weights were recalibrated based on the proportion of participants missing data by age, gender, and race-ethnicity within each NHANES cycle. Recalibration of the sampling weights corrects for differences in missing data across age, gender and race-ethnicity strata and assumes that data within strata are missing at random.<sup>16</sup> We calculated 95% confidence intervals for US population size estimates using Taylor-series variance estimation.<sup>17</sup>

Using REGARDS data may result in an overestimation of the CVD risk in the US population as this study over-sampled blacks. Therefore, we reweighted the REGARDS population to match the US population on age, sex and race-ethnicity when calculating the 10-year risk of CVD events. As the REGARDS study only enrolled blacks and whites, we reweighed black and white REGARDS participants to match the distribution of blacks and non-blacks in the US population. This is equivalent to apply REGARDS ten-year CVD risk in white participants to the other race-ethnicity categories.

#### *Treatment-related serious adverse events*

Treatment-related serious adverse events (SAEs) were defined in SPRINT as events that were fatal or life-threatening, that resulted in clinically significant or persistent disability, that required or prolonged a hospitalization, or that were judged by the investigator to represent a clinically significant hazard or harm to the participant that might require medical or surgical intervention which were classified as possibly or definitely related to the intervention.<sup>18</sup> Treatment-related SAEs in ACCORD-BP were defined as any adverse experience that was significantly life threatening and/or resulted in permanent disability, hospitalization or prolongation of hospitalization and were considered by the investigators to be possibly, probably, or definitely related to antihypertensive medications.



## FIGURES

**Figure S1. Flow-chart of REGARDS study participants included in the current analysis to generate sub-group specific CVD risks.**

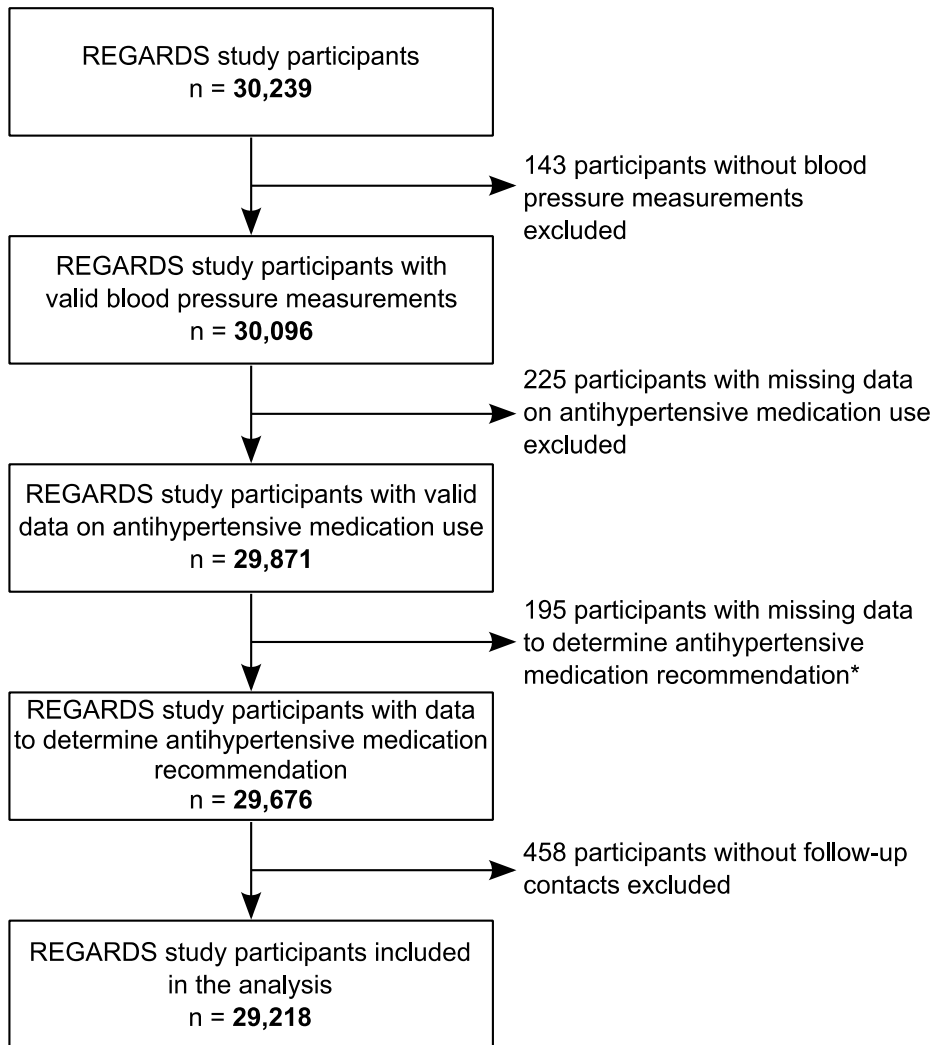

CVD: cardiovascular disease; REGARDS: REasons for Geographic and Racial Differences in Stroke.

**Figure S2. Flow-chart of NHANES 2011-2014 study participants included in the current analysis to generate sub-group specific US adults population size estimates.**

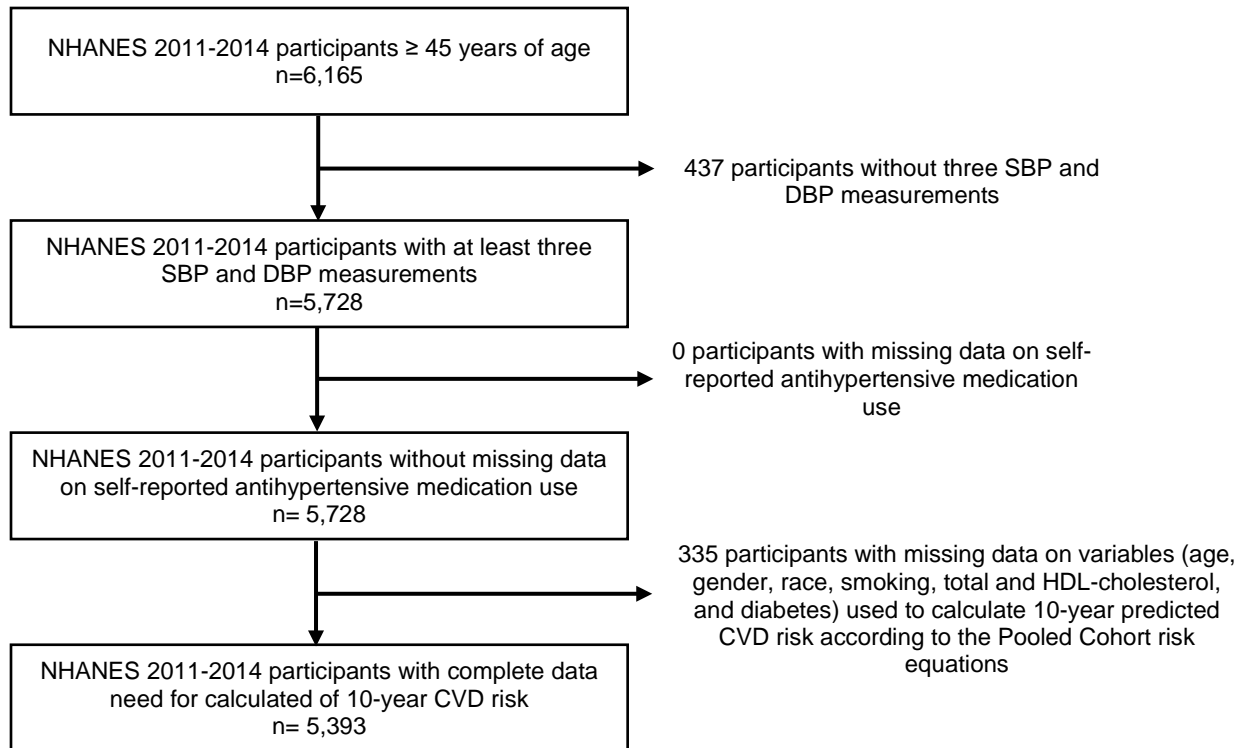

CVD: cardiovascular disease; DBP: diastolic blood pressure; HDL: high-density lipoprotein; NHANES: National Health and Nutrition Examination Surveys; SBP: systolic blood pressure.

| <b>Table S1. Groupings of NHANES and REGARDS study participants not taking (left column) and taking (right column) antihypertensive medication according to their recommendation for pharmacological treatment initiation and intensification for comparisons between JNC7 and 2017 ACC/AHA blood pressure guideline.</b>                                                                                                                                                                                                                                                                                                                                                                                                                                                                                                                                                                                                                                                                                                                                                                                                                                                                                                                                  |                                                                                                                                                                                                                                                                                                                                                                                                                                                                                                                                                                                                                                                                                                                                                                                                                                                                                                                                      |
|------------------------------------------------------------------------------------------------------------------------------------------------------------------------------------------------------------------------------------------------------------------------------------------------------------------------------------------------------------------------------------------------------------------------------------------------------------------------------------------------------------------------------------------------------------------------------------------------------------------------------------------------------------------------------------------------------------------------------------------------------------------------------------------------------------------------------------------------------------------------------------------------------------------------------------------------------------------------------------------------------------------------------------------------------------------------------------------------------------------------------------------------------------------------------------------------------------------------------------------------------------|--------------------------------------------------------------------------------------------------------------------------------------------------------------------------------------------------------------------------------------------------------------------------------------------------------------------------------------------------------------------------------------------------------------------------------------------------------------------------------------------------------------------------------------------------------------------------------------------------------------------------------------------------------------------------------------------------------------------------------------------------------------------------------------------------------------------------------------------------------------------------------------------------------------------------------------|
| <b>Mutually-exclusive groups to be analyzed</b>                                                                                                                                                                                                                                                                                                                                                                                                                                                                                                                                                                                                                                                                                                                                                                                                                                                                                                                                                                                                                                                                                                                                                                                                            |                                                                                                                                                                                                                                                                                                                                                                                                                                                                                                                                                                                                                                                                                                                                                                                                                                                                                                                                      |
| <b>Taking pharmacological antihypertensive medication</b>                                                                                                                                                                                                                                                                                                                                                                                                                                                                                                                                                                                                                                                                                                                                                                                                                                                                                                                                                                                                                                                                                                                                                                                                  |                                                                                                                                                                                                                                                                                                                                                                                                                                                                                                                                                                                                                                                                                                                                                                                                                                                                                                                                      |
| <b>No</b>                                                                                                                                                                                                                                                                                                                                                                                                                                                                                                                                                                                                                                                                                                                                                                                                                                                                                                                                                                                                                                                                                                                                                                                                                                                  | <b>Yes</b>                                                                                                                                                                                                                                                                                                                                                                                                                                                                                                                                                                                                                                                                                                                                                                                                                                                                                                                           |
| <ol style="list-style-type: none"> <li>1. SBP &lt; 130 mm Hg (not recommended antihypertensive medication initiation by the 2017 ACC/AHA BP guidelines or JNC7)</li> <li>2. SBP 130 to &lt;140 mm Hg               <ol style="list-style-type: none"> <li>a. Not recommended antihypertensive medication initiation by the 2017 ACC/AHA GP guidelines or JNC7                   <ol style="list-style-type: none"> <li>a. Without diabetes, CKD, or history of CVD with a 10-year predicted risk for CVD &lt; 10% who are &lt; 65 years of age</li> </ol> </li> <li>b. Recommended antihypertensive medication initiation by the 2017 ACC/AHA BP guideline but not the JNC7                   <ol style="list-style-type: none"> <li>a. Without diabetes or CKD who are either (1) ≥ 65 years of age or (2) with a history of CVD or a 10-year CVD predicted risk ≥ 10%.</li> </ol> </li> <li>c. Recommended antihypertensive medication initiation by the 2017 ACC/AHA BP guideline and JNC7                   <ol style="list-style-type: none"> <li>a. Participants with diabetes or CKD</li> </ol> </li> </ol> </li> <li>3. SBP ≥ 140 mm Hg (recommended antihypertensive medication initiation by the 2017 ACC/AHA BP and JNC7 guidelines)</li> </ol> | <ol style="list-style-type: none"> <li>1. SBP &lt; 130 mm Hg (not recommended antihypertensive medication intensification by the 2017 ACC/AHA blood pressure or JNC7 guidelines)</li> <li>2. SBP 130 to 140 mm Hg               <ol style="list-style-type: none"> <li>a. Recommended antihypertensive medication intensification by the 2017 ACC/AHA blood pressure guideline but not the JNC7 guideline                   <ol style="list-style-type: none"> <li>a. Participants without diabetes or CKD</li> </ol> </li> <li>b. Recommended antihypertensive medication intensification by the 2017 ACC/AHA blood pressure and JNC7 guidelines                   <ol style="list-style-type: none"> <li>a. Participants with diabetes or CKD</li> </ol> </li> </ol> </li> <li>3. SBP ≥ 140 mm Hg (recommended antihypertensive medication intensification by the 2017 ACC/AHA high blood pressure and JNC7 guidelines)</li> </ol> |
| <p>ACC: American College of Cardiology; AHA: American Heart Association; CKD: chronic kidney disease; CVD: cardiovascular disease; JNC7: Seventh Report of the Joint National Committee on Prevention, Detection, Evaluation, and Treatment of High Blood Pressure, NHANES: National Health and Nutrition Examination Surveys, REGARDS: REasons for Geographic and Racial Differences in Stroke, SPB: systolic blood pressure.</p>                                                                                                                                                                                                                                                                                                                                                                                                                                                                                                                                                                                                                                                                                                                                                                                                                         |                                                                                                                                                                                                                                                                                                                                                                                                                                                                                                                                                                                                                                                                                                                                                                                                                                                                                                                                      |

**Table S2. Groupings of NHANES and REGARDS study participants not taking (left column) and taking (right column) antihypertensive medication according to their recommendation for pharmacological treatment initiation and intensification for comparisons between JNC8 Panel Member Report and 2017 ACC/AHA blood pressure guideline.**

| <b>Mutually-exclusive groups to be analyzed</b>                                                                                                                                                                                                                                                                                                                                                                                                                                                                                                                                                                                                                                                                                                                                                                                                                                                                                                                                                                                                                                                                                                                                                                                                                                                                                                                                                                                                                                                                                                                                                                                                                                                                                       |                                                                                                                                                                                                                                                                                                                                                                                                                                                                                                                                                                                                                                                                                                                                                                                                                                                                                                                                                                                                                                                                                                                                                                                                                                                     |
|---------------------------------------------------------------------------------------------------------------------------------------------------------------------------------------------------------------------------------------------------------------------------------------------------------------------------------------------------------------------------------------------------------------------------------------------------------------------------------------------------------------------------------------------------------------------------------------------------------------------------------------------------------------------------------------------------------------------------------------------------------------------------------------------------------------------------------------------------------------------------------------------------------------------------------------------------------------------------------------------------------------------------------------------------------------------------------------------------------------------------------------------------------------------------------------------------------------------------------------------------------------------------------------------------------------------------------------------------------------------------------------------------------------------------------------------------------------------------------------------------------------------------------------------------------------------------------------------------------------------------------------------------------------------------------------------------------------------------------------|-----------------------------------------------------------------------------------------------------------------------------------------------------------------------------------------------------------------------------------------------------------------------------------------------------------------------------------------------------------------------------------------------------------------------------------------------------------------------------------------------------------------------------------------------------------------------------------------------------------------------------------------------------------------------------------------------------------------------------------------------------------------------------------------------------------------------------------------------------------------------------------------------------------------------------------------------------------------------------------------------------------------------------------------------------------------------------------------------------------------------------------------------------------------------------------------------------------------------------------------------------|
| <b>Taking pharmacological antihypertensive medication</b>                                                                                                                                                                                                                                                                                                                                                                                                                                                                                                                                                                                                                                                                                                                                                                                                                                                                                                                                                                                                                                                                                                                                                                                                                                                                                                                                                                                                                                                                                                                                                                                                                                                                             |                                                                                                                                                                                                                                                                                                                                                                                                                                                                                                                                                                                                                                                                                                                                                                                                                                                                                                                                                                                                                                                                                                                                                                                                                                                     |
| <b>No</b>                                                                                                                                                                                                                                                                                                                                                                                                                                                                                                                                                                                                                                                                                                                                                                                                                                                                                                                                                                                                                                                                                                                                                                                                                                                                                                                                                                                                                                                                                                                                                                                                                                                                                                                             | <b>Yes</b>                                                                                                                                                                                                                                                                                                                                                                                                                                                                                                                                                                                                                                                                                                                                                                                                                                                                                                                                                                                                                                                                                                                                                                                                                                          |
| <ol style="list-style-type: none"> <li>1. SBP &lt; 130 mm Hg (not recommended antihypertensive medication initiation by the 2017 ACC/AHA blood pressure or JNC8 panel member report)</li> <li>2. SBP 130 to &lt;140               <ol style="list-style-type: none"> <li>a. Not recommended antihypertensive medication initiation by the 2017 ACC/AHA blood pressure or JNC8 panel member report                   <ol style="list-style-type: none"> <li>i. Age &lt;65 years and</li> <li>ii. Without diabetes, CKD, or clinical CVD and</li> <li>iii. 10-year predicted risk for CVD &lt; 10%</li> </ol> </li> <li>b. Recommended antihypertensive medication initiation by the 2017 ACC/AHA blood pressure guideline but not the JNC8 panel member report                   <ol style="list-style-type: none"> <li>i. Age ≥65 years</li> <li>ii. Diabetes, CKD, or clinical CVD</li> <li>iii. 10-year CVD predicted risk ≥ 10%</li> </ol> </li> </ol> </li> <li>3. SBP 140 to &lt;150 mm Hg               <ol style="list-style-type: none"> <li>a. Recommended antihypertensive medication initiation by the 2017 ACC/AHA blood pressure and JNC8 panel member report                   <ol style="list-style-type: none"> <li>i. Age &lt; 60 years or Diabetes or CKD</li> </ol> </li> <li>b. Recommended antihypertensive medication initiation by the 2017 ACC/AHA high blood pressure guideline but not the JNC8 panel report guideline                   <ol style="list-style-type: none"> <li>i. ≥60 years of age without diabetes or CKD</li> </ol> </li> </ol> </li> <li>4. SBP ≥ 150 mm Hg (recommended antihypertensive medication initiation by the 2017 ACC/AHA high blood pressure and JNC7 guidelines)</li> </ol> | <ol style="list-style-type: none"> <li>1. SBP &lt; 130 (not recommended antihypertensive medication intensification by the 2017 ACC/AHA blood pressure guideline or JNC8 panel member report)</li> <li>2. SBP of 130 to &lt;140 mm Hg               <ol style="list-style-type: none"> <li>a. Recommended antihypertensive medication intensification by the 2017 ACC/AHA blood pressure guideline but not the JNC8 panel member report</li> </ol> </li> <li>3. SBP of 140 to &lt;150 mm Hg               <ol style="list-style-type: none"> <li>a. Recommended antihypertensive medication intensification by the 2017 ACC/AHA BP guideline and the JNC8 panel report guideline                   <ol style="list-style-type: none"> <li>i. &lt;60 years or with diabetes or CKD</li> </ol> </li> <li>b. Recommended antihypertensive medication intensification by the 2017 ACC/AHA BP guideline but not the JNC8 panel report guideline                   <ol style="list-style-type: none"> <li>i. ≥60 years of age without diabetes or CKD</li> </ol> </li> </ol> </li> <li>4. SBP ≥ 150 mm Hg (recommended antihypertensive medication intensification by the 2017 ACC/AHA blood pressure guidelines and JNC8 panel member report)</li> </ol> |
| <p>ACC: American College of Cardiology; AHA: American Heart Association; CKD: chronic kidney disease; CVD: cardiovascular disease; JNC8: Eighth Joint National Committee, NHANES: National Health and Nutrition Examination Surveys, REGARDS: REasons for Geographic and Racial Differences in Stroke, SPB: systolic blood pressure.</p>                                                                                                                                                                                                                                                                                                                                                                                                                                                                                                                                                                                                                                                                                                                                                                                                                                                                                                                                                                                                                                                                                                                                                                                                                                                                                                                                                                                              |                                                                                                                                                                                                                                                                                                                                                                                                                                                                                                                                                                                                                                                                                                                                                                                                                                                                                                                                                                                                                                                                                                                                                                                                                                                     |

**Table S3. Blood pressure levels used to recommend antihypertensive medication, and treatment goal according to the 2017 ACC/AHA guideline, the JNC7 guideline and the JNC8 panel member report.**

|                                                                                                                                            | Guideline recommended SBP/DBP threshold for initiation of pharmacologic therapy, mm Hg |       |                          |
|--------------------------------------------------------------------------------------------------------------------------------------------|----------------------------------------------------------------------------------------|-------|--------------------------|
|                                                                                                                                            | 2017 ACC/AHA                                                                           | JNC7  | JNC8 panel member report |
| <b>Systolic blood pressure, mm Hg</b>                                                                                                      |                                                                                        |       |                          |
| General population                                                                                                                         | ≥ 140                                                                                  | ≥ 140 | ≥ 140                    |
| Diabetes or CKD                                                                                                                            | ≥ 130                                                                                  | ≥ 130 | ≥ 140                    |
| History of CVD or 10-year CVD risk ≥10%*                                                                                                   | ≥ 130                                                                                  | X     | X                        |
| Age ≥ 65 years                                                                                                                             | ≥ 130                                                                                  | ≥ 140 | X                        |
| ≥60 years of age without diabetes or CKD                                                                                                   | X                                                                                      | X     | ≥ 150                    |
| <b>Diastolic blood pressure, mm Hg</b>                                                                                                     |                                                                                        |       |                          |
| General population                                                                                                                         | ≥ 90                                                                                   | ≥ 90  | ≥ 90                     |
| Diabetes or CKD                                                                                                                            | ≥ 80                                                                                   | ≥ 80  |                          |
| History of CVD or 10-year CVD risk ≥10%*                                                                                                   | ≥ 80                                                                                   |       |                          |
| <b>Guideline recommended treatment goal among those taking antihypertensive medication (i.e., threshold for treatment intensification)</b> |                                                                                        |       |                          |
| <b>Systolic blood pressure, mm Hg</b>                                                                                                      |                                                                                        |       |                          |
| General population                                                                                                                         | < 130                                                                                  | < 140 | < 140                    |
| Diabetes or CKD                                                                                                                            | < 130                                                                                  | < 130 | < 140                    |
| ≥60 years of age without diabetes or CKD                                                                                                   | < 130                                                                                  | < 140 | < 150                    |
| <b>Diastolic blood pressure, mm Hg</b>                                                                                                     |                                                                                        |       |                          |
| General population                                                                                                                         | < 80                                                                                   | < 90  | <90                      |
| Diabetes or CKD                                                                                                                            | < 80                                                                                   | < 80  |                          |

ACC: American College of Cardiology; AHA: American Heart Association; CKD: chronic kidney disease; JNC7: Seventh Report of the Joint National Committee on Prevention, Detection, Evaluation, and Treatment of High Blood Pressure, JNC8: Eighth Joint National Committee, NHANES: National Health and Nutrition Examination Surveys, REGARDS: REasons for Geographic and Racial Differences in Stroke, SPB: systolic blood pressure.

\* The 10-year predicted CVD risk is calculated using the Pooled Cohort risk equations.<sup>5</sup>

**Table S4.** List of medications used to identify heart failure at baseline.

| <b>Medication</b>                                                                                                    | <b>Additional requirements</b>                                                                       |
|----------------------------------------------------------------------------------------------------------------------|------------------------------------------------------------------------------------------------------|
| Digoxin                                                                                                              | No atrial fibrillation at baseline by self-report or based on the study electrocardiogram            |
| Carvedilol                                                                                                           | None                                                                                                 |
| Spironolactone                                                                                                       | None                                                                                                 |
| Hydralazine in combination with isosorbide mono- or di-nitrate                                                       | None                                                                                                 |
| Loop diuretic (i.e., furosemide, bumetanide, torsemide)                                                              | None                                                                                                 |
| Angiotensin-converting enzyme inhibitor or angiotensin II receptor <b>blocker</b> in combination with a beta-blocker | SBP <140 mm Hg, DBP <90 mm Hg and self-reporting not taking medication to lower their blood pressure |

DBP: diastolic blood pressure; SBP: systolic blood pressure.

**Table S5. Hazard ratios for CVD events according to current SBP and SBP treatment goal used in calculations to project CVD events prevented with blood pressure guideline implementation.**

| Current SBP, mm Hg | SBP Goal                  |                           |                           |
|--------------------|---------------------------|---------------------------|---------------------------|
|                    | <130 mm Hg<br>HR (95% CI) | <140 mm Hg<br>HR (95% CI) | <150 mm Hg<br>HR (95% CI) |
| <130               | 1.0                       | 1.0                       | 1.0                       |
| 130 to <135        | 0.87 (0.77-0.99)          | 1.0                       | 1.0                       |
| 135 to <140        | 0.83 (0.71-1.01)          | 1.0                       | 1.0                       |
| 140 to <145        | 0.71 (0.61-0.86)          | 0.85 (0.71-1.03)          | 1.0                       |
| 145 to <150        | 0.67 (0.53-0.87)          | 0.81 (0.68-0.96)          | 1.0                       |
| 150 to <155        | 0.56 (0.43-0.76)          | 0.68 (0.51-0.90)          | 0.83 (0.60-1.00)          |
| 155 to <160        | 0.51 (0.40-0.65)          | 0.60 (0.47-0.78)          | 0.75 (0.56-1.00)          |
| ≥160               | 0.44 (0.33-0.61)          | 0.53 (0.39-0.73)          | 0.66 (0.47-0.94)          |

Hazard ratios were derived from a network meta-analysis published by Bundy et al.<sup>15</sup> Major CVD events in Bundy et al<sup>15</sup> includes CHD, stroke, heart failure, and CVD deaths.  
 CHD: coronary heart disease, CI: confidence interval, CVD: cardiovascular disease, HR: hazard ratio, SBP: systolic blood pressure.

**Table S6. Hazard ratios for CVD events according to current blood pressure levels and blood pressure treatment goal used in calculations to project CVD events prevented with blood pressure guideline implementation.**

|                                     | SBP/DBP Goal, mm Hg |                    |                    |
|-------------------------------------|---------------------|--------------------|--------------------|
|                                     | <130/80             | <140/90            | <150/90            |
| <b>Current SBP/DBP, mm Hg</b>       | <b>HR (95% CI)</b>  | <b>HR (95% CI)</b> | <b>HR (95% CI)</b> |
| SBP <130 and DBP <80                | 1.0                 | 1.0                | 1.0                |
| SBP 130 to <135 or DBP 80 to <85    | 0.87 (0.77-0.99)    | 1.0                | 1.0                |
| SBP 135 to <140 or DBP 85 to <90    | 0.83 (0.71-1.01)    | 1.0                | 1.0                |
| SBP 140 to <145 or DBP 90 to <92.5  | 0.71 (0.61-0.86)    | 0.85 (0.71-1.03)   | 1.0                |
| SBP 145 to <150 or DBP 92.5 to <95  | 0.67 (0.53-0.87)    | 0.81 (0.68-0.96)   | 1.0                |
| SBP 150 to <155 or DBP 95 to <97.5  | 0.56 (0.43-0.76)    | 0.68 (0.51-0.90)   | 0.83 (0.60-1.00)   |
| SBP 155 to <160 or DBP 97.5 to <100 | 0.51 (0.40-0.65)    | 0.60 (0.47-0.78)   | 0.75 (0.56-1.00)   |
| SBP ≥160 or DBP ≥100                | 0.44 (0.33-0.61)    | 0.53 (0.39-0.73)   | 0.66 (0.47-0.94)   |

Hazard ratios were derived from a network meta-analysis published by Bundy et al<sup>15</sup> based on SBP categories. Major CVD events in Bundy et al<sup>15</sup> includes CHD, stroke, heart failure, and CVD deaths. DBP categories were created based on expert opinion to match SBP categories defined by Bundy et al.  
 CHD: coronary heart disease, CI: confidence interval, CVD: cardiovascular disease, DBP: diastolic blood pressure, HR: hazard ratio, SBP: systolic blood pressure.  
 Participants whose SBP and DBP correspond to two separate blood pressure categories were assigned to the higher blood pressure group (e.g., participants with SBP/DBP of 135/94 mm Hg were assigned to the SBP 145 to <150 or DBP 92.5 to <95 mm Hg category).



| Study           | Intensive SBP Control Arm |             |                      |                                | Standard SBP Control Arm |             |                      |                                |
|-----------------|---------------------------|-------------|----------------------|--------------------------------|--------------------------|-------------|----------------------|--------------------------------|
|                 | No. of SAE Events         | No. At Risk | Person-years at risk | SAE Events per 1,000 per years | No. of SAE Events        | No. At Risk | Person-years at risk | SAE Events per 1,000 per years |
| ACCORD-BP       | 77                        | 2,362       | 11,810               | 6.5                            | 30                       | 2371        | 11,855               | 2.5                            |
| SPRINT          | 220                       | 4,678       | 15,250               | 14.4                           | 118                      | 4683        | 15,267               | 7.7                            |
| Pooled Together | 297                       | 7,040       | 27,060               | 10.9                           | 148                      | 7054        | 27,122               | 5.5                            |

SAE= Serious Adverse Event, SPRINT= Systolic Blood Pressure Intervention Trial (ACCORD-BP)= The Action to Control Cardiovascular Risk in Diabetes Blood Pressure Trial.  
SAEs were defined in SPRINT as an event that was fatal or life-threatening, that resulted in clinically significant or persistent disability, that required or prolonged a hospitalization, or that was judged by the investigator to represent a clinically significant hazard or harm to the participant that might require medical or surgical intervention to prevent one of the other events listed above that was classified as definitely or probably related to the intervention.  
SAEs were defined in ACCORD-BP as life-threatening, cause permanent disability, or necessitate hospitalization that are attributed to blood-pressure medications.

**Table S8. Characteristics of REGARDS and NHANES 2011-2014 study participants overall and among those taking and not taking antihypertensive medication**

|                                   | NHANES 2011-2014     |                                                       |                                                           | REGARDS               |                                                        |                                                            |
|-----------------------------------|----------------------|-------------------------------------------------------|-----------------------------------------------------------|-----------------------|--------------------------------------------------------|------------------------------------------------------------|
|                                   | Overall<br>(n=5,393) | Taking<br>antihypertensive<br>medication<br>(n=2,333) | Not taking<br>antihypertensive<br>medication<br>(n=3,060) | Overall<br>(n=29,218) | Taking<br>antihypertensive<br>medication<br>(n=15,179) | Not taking<br>antihypertensive<br>medication<br>(n=14,039) |
| <b>Characteristics at visit 1</b> |                      |                                                       |                                                           |                       |                                                        |                                                            |
| Age group, years                  |                      |                                                       |                                                           |                       |                                                        |                                                            |
| 45 – 49                           | 17.2                 | 8.3                                                   | 23.0                                                      | 1,460 (5.0)           | 434 (2.9)                                              | 1,026 (7.3)                                                |
| 50 – 59                           | 34.4                 | 26.2                                                  | 39.7                                                      | 7,604 (26.0)          | 3,351 (22.1)                                           | 4,253 (30.3)                                               |
| 60 – 69                           | 26.0                 | 30.7                                                  | 23.0                                                      | 10,997 (37.6)         | 5,984 (39.4)                                           | 5,013 (35.7)                                               |
| 70 – 79                           | 14.3                 | 21.4                                                  | 9.6                                                       | 7,064 (24.2)          | 4,176 (27.5)                                           | 2,888 (20.6)                                               |
| ≥80                               | 8.1                  | 13.4                                                  | 4.7                                                       | 2,093 (7.2)           | 1,234 (8.1)                                            | 859 (6.1)                                                  |
| Female sex                        | 53.2                 | 54.4                                                  | 52.3                                                      | 16,064 (55.0)         | 8,670 (57.1)                                           | 7,394 (52.7)                                               |
| White                             | 74.0                 | 73.3                                                  | 74.5                                                      | 17,197 (58.9)         | 7,519 (49.5)                                           | 9,678 (68.9)                                               |
| Black                             | 10.4                 | 14.0                                                  | 8.1                                                       | 12,021 (41.1)         | 7,660 (50.5)                                           | 4,361 (31.1)                                               |
| Hispanic                          | 9.4                  | 7.8                                                   | 10.5                                                      | -                     | -                                                      | -                                                          |
| Other race                        | 6.1                  | 4.9                                                   | 6.9                                                       | -                     | -                                                      | -                                                          |
| Current smoker                    | 16.8                 | 14.2                                                  | 18.5                                                      | 4,221 (14.5)          | 2,060 (13.6)                                           | 2,161 (15.4)                                               |
| BMI, kg/m <sup>2</sup>            | 29.3 (0.19)          | 31.0 (0.26)                                           | 28.2 (0.21)                                               | 29.3 (6.2)            | 30.6 (6.4)                                             | 27.9 (5.6)                                                 |
| SBP, mm Hg                        | 126.8 (0.46)         | 131.3 (0.72)                                          | 123.8 (0.57)                                              | 127.6 (16.7)          | 131.4 (16.7)                                           | 123.5 (15.7)                                               |
| DBP, mm Hg                        | 71.6 (0.27)          | 70.5 (0.40)                                           | 72.4 (0.28)                                               | 76.5 (9.7)            | 77.6 (9.9)                                             | 75.2 (9.4)                                                 |
| Total cholesterol, mg/dL          | 197.9 (0.74)         | 189.5 (1.28)                                          | 203 (1.01)                                                | 192.0 (40.1)          | 187.3 (40.0)                                           | 197.0 (39.6)                                               |
| HDL cholesterol, mg/dL            | 54.4 (0.38)          | 52.0 (0.56)                                           | 56.1 (0.45)                                               | 51.8 (16.2)           | 50.6 (15.9)                                            | 53.1 (16.5)                                                |
| History of CVD                    | 13.3                 | 23.7                                                  | 6.5                                                       | 7,966 (27.3)          | 5,565 (36.7)                                           | 2,401 (17.1)                                               |
| 10-year ASCVD risk, %*            | 11.3 (0.27)          | 17.2 (0.50)                                           | 0.2 (0.26)                                                | 14.3 (12.5)           | 18.2 (13.5)                                            | 11.1 (10.6)                                                |
| Statin use                        | 32.3                 | 51.5                                                  | 19.7                                                      | 9,230 (31.7)          | 6,234 (41.1)                                           | 2,996 (21.4)                                               |
| Diabetes                          | 17.5                 | 27.8                                                  | 10.8                                                      | 6,226 (22.0)          | 4,559 (31.0)                                           | 1,667 (12.2)                                               |
| Chronic Kidney Disease            | 21.8                 | 34.2                                                  | 13.7                                                      | 6,381 (22.0)          | 4,496 (29.9)                                           | 1,885 (13.5)                                               |
| eGFR, mL/min/1.73 m <sup>2</sup>  | 81.9 (0.39)          | 75.6 (0.64)                                           | 86.0 (0.37)                                               | 84.9 (20.3)           | 81.4 (22.2)                                            | 88.7 (17.2)                                                |
| eGFR <60                          | 13.4                 | 23.1                                                  | 7.0                                                       | 3,206 (11.4)          | 2,463 (16.9)                                           | 743 (5.5)                                                  |
| ACR, mg/g, GM (95% CI)            | 10.0 (9.6, 10.5)     | 13.2 (12.3, 14.2)                                     | 8.4 (8.1, 8.7)                                            | 10.5 (10.4, 10.7)     | 13.2 (12.9, 13.5)                                      | 8.3 (8.1, 8.4)                                             |
| ACR ≥ 30, mg/g                    | 12.4                 | 18.3                                                  | 8.2                                                       | 4,268 (15.3)          | 2,912 (20.2)                                           | 1,356 (10.1)                                               |

Numbers in the table are proportions or mean (standard error) for NHANES and n (percentage) or mean (standard deviation) for REGARDS, unless otherwise indicated. ACR= albumin-to-creatinine ratio, CI= confidence interval, CVD= atherosclerotic cardiovascular disease, BMI=body mass index, SBP =systolic blood pressure, DBP= diastolic blood pressure, HDL= high-density lipoprotein, LDL= low-density lipoprotein. GM=geometric mean.

\* Among those without a history of CVD.

| <b>Table S9. Covariates included in the current analysis and the method of ascertainment in the National Health and Nutrition Examination Survey, 2011-2014 and the REasons for Geographic And Racial Differences in Stroke study.</b> |                                                                                                                                                                                                        |                                                                                                                                                                                                                          |
|----------------------------------------------------------------------------------------------------------------------------------------------------------------------------------------------------------------------------------------|--------------------------------------------------------------------------------------------------------------------------------------------------------------------------------------------------------|--------------------------------------------------------------------------------------------------------------------------------------------------------------------------------------------------------------------------|
| <b>Variable</b>                                                                                                                                                                                                                        | <b>Ascertainment in NHANES 2011-2014</b>                                                                                                                                                               | <b>Ascertainment in REGARDS</b>                                                                                                                                                                                          |
| Age                                                                                                                                                                                                                                    | Self-report                                                                                                                                                                                            | Self-report                                                                                                                                                                                                              |
| Race-ethnicity                                                                                                                                                                                                                         | Self-report                                                                                                                                                                                            | Self-report                                                                                                                                                                                                              |
| Gender                                                                                                                                                                                                                                 | Self-report                                                                                                                                                                                            | Self-report                                                                                                                                                                                                              |
| Cigarette smoking                                                                                                                                                                                                                      | Self-report                                                                                                                                                                                            | Self-report                                                                                                                                                                                                              |
| History of coronary heart disease                                                                                                                                                                                                      | Self-report                                                                                                                                                                                            | Self-report or evidence of a previous MI on the study electrocardiogram                                                                                                                                                  |
| History of myocardial infarction                                                                                                                                                                                                       | Self-report                                                                                                                                                                                            | Self-report or evidence of a previous MI on the study electrocardiogram                                                                                                                                                  |
| History of stroke                                                                                                                                                                                                                      | Self-report                                                                                                                                                                                            | Self-report                                                                                                                                                                                                              |
| Antihypertensive medication use                                                                                                                                                                                                        | Self-report                                                                                                                                                                                            | Self-report                                                                                                                                                                                                              |
| Glucose lowering medication use                                                                                                                                                                                                        | Self-report                                                                                                                                                                                            | Self-report                                                                                                                                                                                                              |
| Statin Use                                                                                                                                                                                                                             | Pill bottle review during the NHANES examination                                                                                                                                                       | Medication inventory                                                                                                                                                                                                     |
| Diabetes mellitus                                                                                                                                                                                                                      | Fasting serum glucose $\geq$ 126 mg/dL, non-fasting serum glucose $\geq$ 200 mg/dL, hemoglobin A1c $\geq$ 6.5% or self-report of a history of diabetes with concurrent glucose lowering medication use | Fasting glucose $\geq$ 126 mg/dL, non-fasting glucose $\geq$ 200 mg/dL for those who did not fast (n=4,099), or self-report of a prior diagnosis of diabetes with current use of insulin or oral hypoglycemic medication |
| Reduced eGFR                                                                                                                                                                                                                           | eGFR $<$ 60 ml/min/1.73 m <sup>2</sup> calculated using measured serum creatinine and the Chronic Kidney Disease Epidemiology Collaboration equation                                                   | eGFR $<$ 60 ml/min/1.73 m <sup>2</sup> calculated using measured serum creatinine and the Chronic Kidney Disease Epidemiology Collaboration equation                                                                     |
| Albuminuria                                                                                                                                                                                                                            | Urinary albumin-to creatinine ratio $\geq$ 30 mg/g                                                                                                                                                     | Urinary albumin-to creatinine ratio $\geq$ 30 mg/g                                                                                                                                                                       |

NHANES – National Health and Nutrition Examination Survey

eGFR – Estimated glomerular filtration rate

MI – Myocardial Infarction

**Table S10. Detailed listing of treatment-related SAEs reported in SPRINT (top panel) and ACCORD-BP (bottom panel).**<sup>18, 19</sup>

| <b>SPRINT</b>                                                                                                                                                                                                                                                                                                                                                                                                                                                                                                                                                                                                                                                                                                                                                                                                                                            |                                    |                                   |                |
|----------------------------------------------------------------------------------------------------------------------------------------------------------------------------------------------------------------------------------------------------------------------------------------------------------------------------------------------------------------------------------------------------------------------------------------------------------------------------------------------------------------------------------------------------------------------------------------------------------------------------------------------------------------------------------------------------------------------------------------------------------------------------------------------------------------------------------------------------------|------------------------------------|-----------------------------------|----------------|
| <b>Treatment-related SAE</b>                                                                                                                                                                                                                                                                                                                                                                                                                                                                                                                                                                                                                                                                                                                                                                                                                             | <b>Intensive Arm<br/>(n=4,678)</b> | <b>Standard Arm<br/>(n=4,683)</b> | <b>P Value</b> |
|                                                                                                                                                                                                                                                                                                                                                                                                                                                                                                                                                                                                                                                                                                                                                                                                                                                          | <b>no. of patients (%)</b>         | <b>no. of patients (%)</b>        |                |
| Overall                                                                                                                                                                                                                                                                                                                                                                                                                                                                                                                                                                                                                                                                                                                                                                                                                                                  | 220 (4.7)                          | 118 (2.5)                         | 0.001          |
| Conditions of Interest                                                                                                                                                                                                                                                                                                                                                                                                                                                                                                                                                                                                                                                                                                                                                                                                                                   |                                    |                                   |                |
| Hypotension                                                                                                                                                                                                                                                                                                                                                                                                                                                                                                                                                                                                                                                                                                                                                                                                                                              | 83 (1.8)                           | 37 (0.8)                          | <0.001         |
| Syncope                                                                                                                                                                                                                                                                                                                                                                                                                                                                                                                                                                                                                                                                                                                                                                                                                                                  | 64 (1.4)                           | 28 (0.6)                          | 0.006          |
| Bradycardia                                                                                                                                                                                                                                                                                                                                                                                                                                                                                                                                                                                                                                                                                                                                                                                                                                              | 34 (0.7)                           | 24 (0.5)                          | 0.44           |
| Electrolyte abnormality                                                                                                                                                                                                                                                                                                                                                                                                                                                                                                                                                                                                                                                                                                                                                                                                                                  | 69 (1.5)                           | 48 (1.0)                          | 0.05           |
| Injurious fall                                                                                                                                                                                                                                                                                                                                                                                                                                                                                                                                                                                                                                                                                                                                                                                                                                           | 19 (0.4)                           | 13 (0.3)                          | 0.21           |
| Acute Kidney Injury or Acute Renal Failure                                                                                                                                                                                                                                                                                                                                                                                                                                                                                                                                                                                                                                                                                                                                                                                                               | 88 (1.9)                           | 34 (0.7)                          | <0.001         |
| <b>ACCORD-BP</b>                                                                                                                                                                                                                                                                                                                                                                                                                                                                                                                                                                                                                                                                                                                                                                                                                                         |                                    |                                   |                |
| <b>Treatment-related SAE</b>                                                                                                                                                                                                                                                                                                                                                                                                                                                                                                                                                                                                                                                                                                                                                                                                                             | <b>Intensive Arm<br/>(n=2,362)</b> | <b>Standard Arm<br/>(n=2,371)</b> | <b>P Value</b> |
|                                                                                                                                                                                                                                                                                                                                                                                                                                                                                                                                                                                                                                                                                                                                                                                                                                                          | <b>no. of patients (%)</b>         | <b>no. of patients (%)</b>        |                |
| Overall                                                                                                                                                                                                                                                                                                                                                                                                                                                                                                                                                                                                                                                                                                                                                                                                                                                  | 77 (3.3)                           | 30 (1.27)                         | <0.001         |
| Conditions of Interest                                                                                                                                                                                                                                                                                                                                                                                                                                                                                                                                                                                                                                                                                                                                                                                                                                   |                                    |                                   |                |
| Hypotension                                                                                                                                                                                                                                                                                                                                                                                                                                                                                                                                                                                                                                                                                                                                                                                                                                              | 17 (0.7)                           | 1 (0.04)                          | <0.001         |
| Syncope                                                                                                                                                                                                                                                                                                                                                                                                                                                                                                                                                                                                                                                                                                                                                                                                                                                  | 12 (0.5)                           | 5 (0.21)                          | 0.10           |
| Bradycardia or arrhythmia                                                                                                                                                                                                                                                                                                                                                                                                                                                                                                                                                                                                                                                                                                                                                                                                                                | 12 (0.5)                           | 3 (0.13)                          | 0.02           |
| Hyperkalemia                                                                                                                                                                                                                                                                                                                                                                                                                                                                                                                                                                                                                                                                                                                                                                                                                                             | 9 (0.4)                            | 1 (0.04)                          | 0.01           |
| Angioedema                                                                                                                                                                                                                                                                                                                                                                                                                                                                                                                                                                                                                                                                                                                                                                                                                                               | 6 (0.3)                            | 4 (0.17)                          | 0.55           |
| Renal failure                                                                                                                                                                                                                                                                                                                                                                                                                                                                                                                                                                                                                                                                                                                                                                                                                                            | 5 (0.2)                            | 1 (0.04)                          | 0.12           |
| <p>SAE= Serious Adverse Event, SPRINT= Systolic Blood Pressure Intervention Trial (ACCORD-BP)= The Action to Control Cardiovascular Risk in Diabetes Blood Pressure Trial.</p> <p>SAEs were defined in SPRINT as an event that was fatal or life-threatening, that resulted in clinically significant or persistent disability, that required or prolonged a hospitalization, or that was judged by the investigator to represent a clinically significant hazard or harm to the participant that might require medical or surgical intervention to prevent one of the other events listed above that was classified as definitely or probably related to the intervention.</p> <p>SAEs were defined in ACCORD-BP as life-threatening, cause permanent disability, or necessitate hospitalization that are attributed to blood-pressure medications.</p> |                                    |                                   |                |

**Table S11. Calculations showing that given an average medication adherence of typical of BP lowering trial of about 75%, the lower bounds of our uncertainty ranges imply an effect size reflecting medication adherence as low as 28%.<sup>20</sup>**

| Current SBP, mmHg | Hazard ratio for treatment to goal of SBP <130 mmHg |      |      | $\beta$ coefficients (natural log of the hazard ratios for treatment to goal) |        |        | Assume HR of PE reflects 75% adherence:<br>Calculate $\beta_{total}$<br>$\beta_{PE} = 0.75 * \beta_{total}$<br><br>$\beta_{total} = \beta_{PE} / 0.75$ | Calculate percent medication adherence using the Upper Confidence limit of the hazard ratio<br><br>Since $\beta_{UCL} = x * \beta_{total}$<br><b>UCL adherence = <math>x = \beta_{UCL} / \beta_{total}</math></b> |
|-------------------|-----------------------------------------------------|------|------|-------------------------------------------------------------------------------|--------|--------|--------------------------------------------------------------------------------------------------------------------------------------------------------|-------------------------------------------------------------------------------------------------------------------------------------------------------------------------------------------------------------------|
|                   | PE                                                  | LCL  | UCL  | PE                                                                            | LCL    | UCL    | $\beta_{total}$                                                                                                                                        | Medication Adherence                                                                                                                                                                                              |
| 130 to <135       | 0.87                                                | 0.77 | 0.99 | -0.139                                                                        | -0.261 | -0.010 | -0.186                                                                                                                                                 | 5.4%                                                                                                                                                                                                              |
| 135 to <140       | 0.83                                                | 0.71 | 1.01 | -0.186                                                                        | -0.342 | 0.010  | -0.248                                                                                                                                                 | -4.0%                                                                                                                                                                                                             |
| 140 to <145       | 0.71                                                | 0.61 | 0.86 | -0.342                                                                        | -0.494 | -0.151 | -0.457                                                                                                                                                 | 33.0%                                                                                                                                                                                                             |
| 145 to <150       | 0.67                                                | 0.53 | 0.87 | -0.400                                                                        | -0.635 | -0.139 | -0.534                                                                                                                                                 | 26.1%                                                                                                                                                                                                             |
| 150 to <155       | 0.56                                                | 0.43 | 0.76 | -0.580                                                                        | -0.844 | -0.274 | -0.773                                                                                                                                                 | 35.5%                                                                                                                                                                                                             |
| 155 to <160       | 0.51                                                | 0.4  | 0.65 | -0.673                                                                        | -0.916 | -0.431 | -0.898                                                                                                                                                 | 48.0%                                                                                                                                                                                                             |
| ≥160              | 0.44                                                | 0.33 | 0.61 | -0.821                                                                        | -1.109 | -0.494 | -1.095                                                                                                                                                 | 45.2%                                                                                                                                                                                                             |
|                   |                                                     |      |      |                                                                               |        |        | <b>Average</b>                                                                                                                                         | <b>27.0%</b>                                                                                                                                                                                                      |

PE=Point estimate, LCL=lower confidence limit, UCL=upper confidence limit

**Table S12. Projected number of US adults recommended and not recommended pharmacological antihypertensive treatment, treatment-related SAEs expected under *current SBP levels*, and treatment-related SAEs potentially incurred in the next ten years in adults aged  $\geq 45$  years by achieving and maintaining 2017 ACC/AHA and JNC7 Guideline-Recommended SBP Goals.**

|                                                                              | US Adults,<br>millions<br>(95% CI) | Treatment-<br>related SAEs<br>expected with<br>current SBP<br>levels, millions<br>(95% CI) | Projected additional treatment-<br>related SAEs expected with<br>achieving guideline-recommended<br>SBP goals, millions (UR) |                                | Difference<br>(UR)             |
|------------------------------------------------------------------------------|------------------------------------|--------------------------------------------------------------------------------------------|------------------------------------------------------------------------------------------------------------------------------|--------------------------------|--------------------------------|
|                                                                              |                                    |                                                                                            | JNC7                                                                                                                         | 2017 ACC/AHA                   |                                |
| <b>Currently not taking antihypertensive medication</b>                      |                                    |                                                                                            |                                                                                                                              |                                |                                |
| <b>SBP &lt;130 mm Hg</b>                                                     |                                    |                                                                                            |                                                                                                                              |                                |                                |
| Antihypertensive medications not recommended by 2017 ACC/AHA or JNC7         | 51.3<br>(44.5-58.1)                | 0                                                                                          | -                                                                                                                            | -                              | -                              |
| <b>SBP 130 to &lt;140 mm Hg</b>                                              |                                    |                                                                                            |                                                                                                                              |                                |                                |
| Antihypertensive medications not recommended by 2017 ACC/AHA or JNC7         | 5.2<br>(3.6-6.7)                   | 0                                                                                          | -                                                                                                                            | -                              | -                              |
| Antihypertensive medications recommended by the 2017 ACC/AHA but not by JNC7 | 3.5<br>(2.4-4.6)                   | 0                                                                                          | -                                                                                                                            | 0.4<br>(0.3-0.5)               | 0.4<br>(0.3-0.5)               |
| Antihypertensive medications recommended by the 2017 ACC/AHA and by JNC7     | 3.0<br>(1.6-4.4)                   | 0                                                                                          | 0.3<br>(0.2-0.5)                                                                                                             | 0.3<br>(0.2-0.5)               | 0                              |
| <b>SBP <math>\geq 140</math> mm Hg</b>                                       |                                    |                                                                                            |                                                                                                                              |                                |                                |
| Antihypertensive medications recommended by the 2017 ACC/AHA and by JNC7     | 11.4<br>(7.2-15.6)                 | 0                                                                                          | 0.8<br>(0.5-01.2)                                                                                                            | 1.2<br>(0.8-01.7)              | 0.4<br>(0.3-0.5)               |
| <b>Total</b>                                                                 | <b>74.3</b><br><b>(59.3-89.4)</b>  | <b>0</b>                                                                                   | <b>1.2</b><br><b>(0.7-1.6)</b>                                                                                               | <b>2.0</b><br><b>(1.2-2.7)</b> | <b>0.8</b><br><b>(0.5-1.0)</b> |
| <b>Currently taking antihypertensive medication</b>                          |                                    |                                                                                            |                                                                                                                              |                                |                                |
| <b>SBP &lt;130 mm Hg</b>                                                     |                                    |                                                                                            |                                                                                                                              |                                |                                |
| Treatment intensification not recommended by the 2017 ACC/AHA or JNC7        | 24.7 (20.9-28.5)                   | 1.3<br>(1.1-1.6)                                                                           | -                                                                                                                            | -                              | -                              |
| <b>SBP 130 to &lt;140 mm Hg</b>                                              |                                    |                                                                                            |                                                                                                                              |                                |                                |
| Treatment intensification recommended by the 2017 ACC/AHA but not JNC7       | 5.2<br>(3.8-6.6)                   | 0.3<br>(0.2-0.4)                                                                           | -                                                                                                                            | 0.3<br>(0.2-0.4)               | 0.3<br>(0.2-0.4)               |
| Treatment intensification recommended by the 2017 ACC/AHA and JNC7           | 5.0<br>(3.9-6.1)                   | 0.3<br>(0.2-0.3)                                                                           | 0.3<br>(0.2-0.3)                                                                                                             | 0.3<br>(0.2-0.3)               | 0                              |
| <b>SBP <math>\geq 140</math> mm Hg</b>                                       |                                    |                                                                                            |                                                                                                                              |                                |                                |
| Treatment intensification recommended by the 2017 ACC/AHA and by JNC7        | 13.8<br>(9.3-18.3)                 | 0.8<br>(0.5-1.0)                                                                           | 0.6<br>(0.4-0.8)                                                                                                             | 0.8<br>(0.5-1.0)               | 0.2<br>(0.1-0.2)               |
| <b>Total</b>                                                                 | <b>48.7</b><br><b>(37.9-59.5)</b>  | <b>2.7</b><br><b>(2.1-3.2)</b>                                                             | <b>0.9</b><br><b>(0.6-01.1)</b>                                                                                              | <b>1.3</b><br><b>(0.9-1.7)</b> | <b>0.4</b><br><b>(0.3-0.6)</b> |

| <b>Overall (Taking and not taking Antihypertensive Medication)</b> |              |           |           |           |           |
|--------------------------------------------------------------------|--------------|-----------|-----------|-----------|-----------|
| <b>Total</b>                                                       | 123.1        | 2.7       | 2.0       | 3.3       | 1.2       |
|                                                                    | (97.2-148.9) | (2.1-3.2) | (1.3-2.8) | (2.2-4.4) | (0.8-1.6) |

ACC: American College of Cardiology; AHA: American Heart Association; CI: confidence interval; CVD: cardiovascular disease; JNC7: Seventh Report of the Joint National Committee on Prevention, Detection, Evaluation, and Treatment of High Blood Pressure; SBP: systolic blood pressure. In this table, recommendations for antihypertensive medication by the 2017 ACC/AHA high blood pressure guideline but not JNC7 include adults without diabetes or CKD (1) age  $\geq 65$  years with SBP 130-139 mm Hg and, or (2) with SBP 130-139/80-89 mm Hg with a history of CVD or a 10-year predicted CVD risk  $\geq 10\%$  on the Pooled Cohort risk equations. Recommendations for antihypertensive medication by the 2017 ACC/AHA high blood pressure guideline and JNC7 include (1) SBP 130-139/80-89 mm Hg with diabetes or CKD, and (2) SBP  $\geq 140/80$  mm Hg. Recommendation for intensification of antihypertensive medication by the 2017 ACC/AHA high blood pressure guideline but not by JNC7 includes SBP 130-139 mm Hg without diabetes or CKD. Recommendations for intensification of antihypertensive medication by the 2017 ACC/AHA high blood pressure guideline and JNC7 include (1) SBP 130 to  $<140$  mm Hg with diabetes or CKD, and (2) SBP  $\geq 140$  mm Hg.

UR: Uncertainty range. The uncertainty range represents the upper and lower bound from the analyses of extremes sensitivity analysis where the number of cardiovascular disease events prevented is recalculated using the upper and lower confidence bounds of both treatment effect size magnitude in the trials meta-analysis<sup>15</sup> and REGARDS ten-year cardiovascular event rate.<sup>21-23</sup> The lower bound is calculated using the upper bound of the hazard ratio and the lower bound of the REGARDS ten-year cardiovascular event rate. The upper bound is calculated using the lower bound of the hazard ratio and the upper bound of the REGARDS ten-year cardiovascular event rate.

**Table S13. Projected number of US adults recommended and not recommended pharmacological antihypertensive treatment, treatment-related SAEs expected under *current SBP levels*, and treatment-related SAEs potentially incurred in the next ten years in adults aged  $\geq 45$  years by Achieving and Maintaining 2017 ACC/AHA and JNC8 Panel Members Guideline-Recommended SBP Goals.**

|                                                                                    | US Adults,<br>millions<br>(95% CI) | Treatment-related SAEs<br>expected with current<br>SBP levels, millions<br>(95% CI) | Projected additional treatment-related<br>SAEs expected with achieving<br>guideline-recommended SBP goals,<br>millions (UR) |                  | Difference<br>(UR) |
|------------------------------------------------------------------------------------|------------------------------------|-------------------------------------------------------------------------------------|-----------------------------------------------------------------------------------------------------------------------------|------------------|--------------------|
|                                                                                    |                                    |                                                                                     | JNC8                                                                                                                        | 2017 ACC/AHA     |                    |
|                                                                                    |                                    |                                                                                     |                                                                                                                             |                  |                    |
| <b>Currently not taking antihypertensive medication</b>                            |                                    |                                                                                     |                                                                                                                             |                  |                    |
| <b>SBP &lt;130 mm Hg</b>                                                           | 51.3<br>(44.5-58.1)                | 0                                                                                   | -                                                                                                                           | -                | -                  |
| <b>SBP 130 to &lt;140 mm Hg</b>                                                    |                                    |                                                                                     |                                                                                                                             |                  |                    |
| Antihypertensive medications not recommended<br>by 2017 ACC/AHA or JNC8 PM         | 5.2<br>(3.6-6.7)                   | 0                                                                                   | -                                                                                                                           | -                | -                  |
| Antihypertensive medications recommended by<br>the 2017 ACC/AHA but not by JNC8 PM | 6.5<br>(4.6-8.4)                   | 0                                                                                   | -                                                                                                                           | 0.7<br>(0.5-0.9) | 0.7<br>(0.5-0.9)   |
| <b>SBP 140 to &lt;150 mm Hg</b>                                                    |                                    |                                                                                     |                                                                                                                             |                  |                    |
| Antihypertensive medications recommended by<br>the 2017 ACC/AHA and by JNC8 PM     | 4.5<br>(3.3-5.7)                   | 0                                                                                   | 0.2<br>(0.2-0.3)                                                                                                            | 0.5<br>(0.4-0.6) | 0.2<br>(0.2-0.3)   |
| Antihypertensive medications recommended by<br>the 2017 ACC/AHA but not by JNC8 PM | 1.8<br>(1.-2.6)                    | 0                                                                                   | -                                                                                                                           | 0.2<br>(0.1-0.3) | 0.2<br>(0.1-0.3)   |
| <b>SBP <math>\geq 150</math> mm Hg</b>                                             |                                    |                                                                                     |                                                                                                                             |                  |                    |
| Antihypertensive medications recommended by<br>the 2017 ACC/AHA and by JNC8 PM     | 5.1<br>(2.9-7.3)                   | 0                                                                                   | 0.3<br>(0.2-0.4)                                                                                                            | 0.6<br>(0.3-0.8) | 0.3<br>(0.2-0.4)   |
| <b>Total</b>                                                                       | 74.3<br>(59.9-88.8)                | 0                                                                                   | 0.5<br>(0.3-0.7)                                                                                                            | 2.0<br>(0.1-2.6) | 0.4<br>(1.0-1.9)   |
| <b>Currently taking antihypertensive medication</b>                                |                                    |                                                                                     |                                                                                                                             |                  |                    |
| <b>SBP &lt;130 mm Hg</b>                                                           | 24.7<br>(20.9-28.5)                | 1.3<br>(1.1-1.6)                                                                    | 0                                                                                                                           | 0                | 0                  |
| <b>SBP 130 to &lt;140 mm Hg</b>                                                    |                                    |                                                                                     |                                                                                                                             |                  |                    |
| Treatment intensification recommended by the<br>2017 ACC/AHA but not JNC8 PM       | 10.2<br>(8.3-12.2)                 | 0.6<br>(0.5-0.7)                                                                    | 0                                                                                                                           | 0.6<br>(0.5-0.7) | 0.6<br>(0.5-0.7)   |
| <b>SBP 140 to &lt;150 mm Hg</b>                                                    |                                    |                                                                                     |                                                                                                                             |                  |                    |
| Treatment intensification recommended by the<br>2017 ACC/AHA and JNC8 PM           | 3.9<br>(2.9-4.9)                   | 0.2<br>(0.2-0.3)                                                                    | 0.1<br>(0.1-0.1)                                                                                                            | 0.2<br>(0.2-0.3) | 0.1<br>(0.1-0.1)   |
| Treatment intensification recommended by the<br>2017 ACC/AHA but not JNC8 PM       | 2.4<br>(1.3-3.4)                   | 0.1<br>(0.1-0.2)                                                                    | 0                                                                                                                           | 0.1<br>(0.1-0.2) | 0.1<br>(0.1-0.2)   |
| <b>SBP <math>\geq 150</math> mm Hg</b>                                             |                                    |                                                                                     |                                                                                                                             |                  |                    |
| Treatment intensification recommended by the<br>2017 ACC/AHA and JNC8 PM           | 7.5<br>(5.1-9.9)                   | 0.4<br>(0.3-0.5)                                                                    | 0.2<br>(0.1-0.3)                                                                                                            | 0.4<br>(0.3-0.5) | 0.2<br>(0.1-0.3)   |
| <b>Total</b>                                                                       | 48.7<br>(38.5-58.9)                | 2.7<br>(2.1-3.2)                                                                    | 0.3<br>(0.2-0.4)                                                                                                            | 1.3<br>(1.0-1.7) | 1.0<br>(0.7-0.1.3) |



| <b>Overall (Taking and not taking Antihypertensive Medication)</b> |                       |                  |                  |                  |                  |
|--------------------------------------------------------------------|-----------------------|------------------|------------------|------------------|------------------|
| <b>Total</b>                                                       | 123.1<br>(98.4-147.7) | 2.7<br>(2.1-3.2) | 0.8<br>(0.6-1.1) | 3.3<br>(2.3-4.3) | 2.4<br>(1.7-3.2) |

ACC: American College of Cardiology; AHA: American Heart Association; CI: confidence interval; CVD: cardiovascular disease; JNC8 PM: 2014 evidence-based guideline for the management of high blood pressure in adults: report from the panel members appointed to the Eighth Joint National Committee (JNC 8); SBP: systolic blood pressure. In this table, recommendations for antihypertensive medication by the 2017 ACC/AHA high blood pressure guideline but not JNC7 include adults without diabetes or CKD (1) age  $\geq 65$  years with SBP 130-139 mm Hg and, or (2) with SBP 130-139/80-89 mm Hg with a history of CVD or a 10-year predicted CVD risk  $\geq 10\%$  on the Pooled Cohort risk equations. Recommendations for antihypertensive medication by the 2017 ACC/AHA high blood pressure guideline and JNC7 include (1) SBP 130-139/80-89 mm Hg with diabetes or CKD, and (2) SBP  $\geq 140/80$  mm Hg. Recommendation for intensification of antihypertensive medication by the 2017 ACC/AHA high blood pressure guideline but not by JNC7 includes SBP 130-139 mm Hg without diabetes or CKD. Recommendations for intensification of antihypertensive medication by the 2017 ACC high blood pressure guideline and JNC7 include (1) SBP 130 to  $< 140$  mm Hg with diabetes or CKD, and (2) SBP  $\geq 140$  mm Hg.

UR: Uncertainty range. The uncertainty range represents the upper and lower bound from the analysis of extremes sensitivity analysis where the number of cardiovascular disease events prevented is recalculated using the upper and lower confidence bounds of both treatment effect size magnitude in the trials meta-analysis<sup>15</sup> and REGARDS ten-year cardiovascular event rate.<sup>21-23</sup> The lower bound is calculated using the upper bound of the hazard ratio and the lower bound of the REGARDS ten-year cardiovascular event rate. The upper bound is calculated using the lower bound of the hazard ratio and the upper bound of the REGARDS ten-year cardiovascular event rate.

**Table S14. Projected number of US adults recommended and not recommended pharmacological antihypertensive treatment, CVD events expected under current BP levels, and CVD potentially prevented in the next 10 years in adults aged  $\geq 45$  years by achieving and maintaining 2017 ACC/AHA and JNC7 Guideline-Recommended BP Goals. Sensitivity analysis defining BP lowering effects based on SBP and DBP levels.**

|                                                                                    | US Adults,<br>millions<br>(95% CI)  | CVD events<br>expected with<br>current BP<br>levels, millions<br>(95% CI) | Projected CVD events prevented<br>with achieving guideline-<br>recommended BP goals, millions<br>(UR) |                                | Difference<br>(UR)             |
|------------------------------------------------------------------------------------|-------------------------------------|---------------------------------------------------------------------------|-------------------------------------------------------------------------------------------------------|--------------------------------|--------------------------------|
|                                                                                    |                                     |                                                                           | JNC7                                                                                                  | 2017 ACC/AHA                   |                                |
| <b>Currently not taking antihypertensive medication</b>                            |                                     |                                                                           |                                                                                                       |                                |                                |
| <b>SBP &lt;130 mm Hg and DBP &lt;80 mm Hg</b>                                      |                                     |                                                                           |                                                                                                       |                                |                                |
| Antihypertensive medications not recommended by 2017 ACC/AHA or JNC7               | 44.6<br>(38.9-50.3)                 | 3.0<br>(2.8-3.3)                                                          | -                                                                                                     | -                              | -                              |
| <b>SBP 130 to &lt;140 mm Hg or DBP 80 to &lt;90 mm Hg</b>                          |                                     |                                                                           |                                                                                                       |                                |                                |
| Antihypertensive medications not recommended by 2017 ACC/AHA or JNC7               | 9.5<br>(6.9-12.1)                   | 0.3<br>(0.2-0.4)                                                          | -                                                                                                     | -                              | -                              |
| Antihypertensive medications recommended by the 2017 ACC/AHA but not by JNC7       | 3.9<br>(2.7-5.2)                    | 0.6<br>(0.5-0.7)                                                          | -                                                                                                     | 0.1<br>(0.0-0.2)               | 0.1<br>(0.0-0.2)               |
| Antihypertensive medications recommended by the 2017 ACC/AHA and by JNC7           | 3.8<br>(2.4-5.1)                    | 0.8<br>(0.6-0.9)                                                          | 0.1<br>(0.0-0.2)                                                                                      | 0.1<br>(0.0-0.2)               | 0                              |
| <b>SBP <math>\geq 140</math> mm Hg or DBP <math>\geq 90</math> mm Hg</b>           |                                     |                                                                           |                                                                                                       |                                |                                |
| Antihypertensive medications recommended by the 2017 ACC/AHA and by JNC7           | 11.4<br>(7.0-15.8)                  | 2.1<br>(1.4-2.9)                                                          | 0.7<br>(0.2-1.4)                                                                                      | 0.9<br>(0.3-1.5)               | 0.1<br>(0.1-0.1)               |
| <b>Total</b>                                                                       | <b>73.2</b><br><b>(57.9-88.4)</b>   | <b>6.8</b><br><b>(5.5-8.2)</b>                                            | <b>0.8</b><br><b>(0.2-1.6)</b>                                                                        | <b>1.1</b><br><b>(0.3-1.9)</b> | <b>0.2</b><br><b>(0.1-0.3)</b> |
| <b>Currently taking antihypertensive medication</b>                                |                                     |                                                                           |                                                                                                       |                                |                                |
| <b>SBP &lt;130 mm Hg and DBP &lt;80 mm Hg</b>                                      |                                     |                                                                           |                                                                                                       |                                |                                |
| Treatment intensification not recommended by the 2017 ACC/AHA or JNC7 BP Guideline | 22.3<br>(18.6-26.0)                 | 3.8<br>(3.5-4.1)                                                          | -                                                                                                     | -                              | -                              |
| <b>SBP 130 to &lt;140 mm Hg or DBP 80 to &lt;90 mm Hg</b>                          |                                     |                                                                           |                                                                                                       |                                |                                |
| Treatment intensification recommended by the 2017 ACC/AHA but not JNC7             | 6.2<br>(4.7-7.7)                    | 0.8<br>(0.6-0.9)                                                          | -                                                                                                     | 0.1<br>(0.0-0.2)               | 0.1<br>(0.0-0.2)               |
| Treatment intensification recommended by the 2017 ACC/AHA and JNC7                 | 5.1<br>(4.0-6.2)                    | 1.4<br>(1.2-1.5)                                                          | 0.2<br>(0.0-0.4)                                                                                      | 0.2<br>(0.0-0.4)               | 0                              |
| <b>SBP <math>\geq 140</math> mm Hg or DBP <math>\geq 90</math> mm Hg</b>           |                                     |                                                                           |                                                                                                       |                                |                                |
| Treatment intensification recommended by the 2017 ACC/AHA and by JNC7              | 13.8<br>(9.4-18.2)                  | 3.7<br>(2.9-4.4)                                                          | 1.5<br>(0.7-2.3)                                                                                      | 1.6<br>(0.8-2.5)               | 0.1<br>(0.1-0.1)               |
| <b>Total</b>                                                                       | <b>47.4</b><br><b>(36.6-58.2)</b>   | <b>9.6</b><br><b>(8.2-11.0)</b>                                           | <b>1.7</b><br><b>(0.7-2.7)</b>                                                                        | <b>1.9</b><br><b>(0.8-3.1)</b> | <b>0.2</b><br><b>(0.1-0.4)</b> |
| <b>Overall (Taking and not taking Antihypertensive Medication)</b>                 |                                     |                                                                           |                                                                                                       |                                |                                |
| <b>Total</b>                                                                       | <b>120.6</b><br><b>(94.6-146.6)</b> | <b>16.2</b><br><b>(13.7-18.8)</b>                                         | <b>2.5</b><br><b>(0.9-4.4)</b>                                                                        | <b>3.0</b><br><b>(1.1-4.8)</b> | <b>0.5</b><br><b>(0.2-0.7)</b> |

---

ACC: American College of Cardiology; AHA: American Heart Association; BP: blood pressure; CKD: chronic kidney disease; CVD: cardiovascular disease; DBP: diastolic blood pressure; JNC7: Seventh Report of the Joint National Committee on Prevention, Detection, Evaluation, and Treatment of High Blood Pressure; SBP: systolic blood pressure.

Recommendations for antihypertensive medication by the 2017 ACC/AHA high blood pressure guideline but not JNC7 include adults without diabetes or CKD (1) age  $\geq 65$  years with SBP 130-139 mm Hg and, or (2) with SBP/DBP 130-139/80-89 mm Hg with a history of CVD or a 10-year predicted CVD risk  $\geq 10\%$  on the Pooled Cohort risk equations. Recommendations for antihypertensive medication by the 2017 ACC/AHA high blood pressure guideline and JNC7 include (1) SBP/DBP 130-139/80-89 mm Hg with diabetes or CKD, and (2) SBP/DBP  $\geq 140/80$  mm Hg. Recommendation for intensification of antihypertensive medication by the 2017 ACC/AHA high blood pressure guideline but not by JNC7 includes SBP 130-139 mm Hg without diabetes or CKD. Recommendations for intensification of antihypertensive medication by the 2017 ACC/AHA high blood pressure guideline and JNC7 include (1) SBP/DBP 130-139/80-89 mm Hg with diabetes or CKD, and (2) SBP/DBP  $\geq 140/80$  mm Hg.

UR: Uncertainty range. The uncertainty interval represents the upper and lower bound from the analysis of extremes sensitivity analysis where the number of cardiovascular disease events prevented is recalculated using the upper and lower confidence bounds of both treatment effect size magnitude in the trials meta-analysis<sup>15</sup> and REGARDS ten-year cardiovascular event rate.<sup>21-23</sup> The lower bound is calculated using the upper bound of the hazard ratio and the lower bound of the REGARDS ten-year cardiovascular event rate. The upper bound is calculated using the lower bound of the hazard ratio and the upper bound of the REGARDS ten-year cardiovascular event rate.

**Table S15. Projected number of US adults recommended and not recommended pharmacological antihypertensive treatment, CVD events expected under *current BP levels*, and projected CVD averted in the next 10 years in adults aged  $\geq 45$  by Achieving and Maintaining 2017 ACC/AHA and JNC7 Guideline-Recommended SBP Goals. Sensitivity analysis defining BP lowering effects based on SBP and DBP levels.**

| Blood Pressure Levels and Guideline Recommendation for Antihypertensive Medication Initiation or Intensification | US Adults, millions (95% CI)      | CVD events expected with current BP levels, millions, (95% CI) | Projected CVD events prevented with achieving guideline-recommended BP goals, millions (UR) |                                | Difference (UR)                |
|------------------------------------------------------------------------------------------------------------------|-----------------------------------|----------------------------------------------------------------|---------------------------------------------------------------------------------------------|--------------------------------|--------------------------------|
|                                                                                                                  |                                   |                                                                | JNC8                                                                                        | 2017 ACC/AHA                   |                                |
| <b>Currently not taking antihypertensive medication</b>                                                          |                                   |                                                                |                                                                                             |                                |                                |
| <b>SBP &lt;130 mm Hg and DBP &lt;80 mm Hg</b>                                                                    | 44.6<br>(38.9-50.3)               | 3.0<br>(2.8-3.3)                                               | -                                                                                           | -                              | -                              |
| <b>SBP 130 to &lt;140 mm Hg or DBP 80 to &lt; 90 mm Hg</b>                                                       |                                   |                                                                |                                                                                             |                                |                                |
| Antihypertensive medications not recommended by 2017 ACC/AHA or JNC8                                             | 9.5<br>(6.9-12.1)                 | 0.3<br>(0.2-0.4)                                               | -                                                                                           | -                              | -                              |
| Antihypertensive medications recommended by the 2017 ACC/AHA but not by JNC8                                     | 7.7<br>(5.7-9.7)                  | 1.3<br>(1.1-1.4)                                               | -                                                                                           | 0.2<br>(0.0-0.4)               | 0.2<br>(0.0-0.4)               |
| <b>SBP 140 to &lt;150 mm Hg or DBP 90 to &lt;95 mm Hg</b>                                                        |                                   |                                                                |                                                                                             |                                |                                |
| Antihypertensive medications recommended by the 2017 ACC/AHA and by JNC8                                         | 5.2<br>(3.9-6.5)                  | 0.8<br>(0.6-1.0)                                               | 0.1<br>(0.0-0.3)                                                                            | 0.2<br>(0.1-0.4)               | 0.1<br>(0.1-0.1)               |
| Antihypertensive medications recommended by the 2017 ACC/AHA but not by JNC8                                     | 1.8<br>(1.0-2.6)                  | 0.3<br>(0.2-0.5)                                               | -                                                                                           | 0.1<br>(0.0-0.2)               | 0.1<br>(0.0-0.2)               |
| <b>SBP <math>\geq</math> 150 mm Hg or DBP <math>\geq</math> 95 mm Hg</b>                                         |                                   |                                                                |                                                                                             |                                |                                |
| Antihypertensive medications recommended by the 2017 ACC/AHA and by JNC8                                         | 5.1<br>(2.9-7.3)                  | 1.0<br>(0.6-1.4)                                               | 0.3<br>(0.1-0.7)                                                                            | 0.5<br>(0.2-0.9)               | 0.1<br>(0.1-0.1)               |
| <b>Total</b>                                                                                                     | <b>73.9</b><br><b>(59.3-88.4)</b> | <b>6.8</b><br><b>(5.5-8.2)</b>                                 | <b>0.5</b><br><b>(0.1-1.0)</b>                                                              | <b>1.1</b><br><b>(0.3-1.9)</b> | <b>0.5</b><br><b>(0.2-0.8)</b> |
| <b>Currently taking antihypertensive medication</b>                                                              |                                   |                                                                |                                                                                             |                                |                                |
| <b>SBP &lt;130 mm Hg and DBP &lt;80 mm Hg</b>                                                                    | 22.3<br>(18.6-26.0)               | 3.8<br>(3.5-4.1)                                               | -                                                                                           | -                              | -                              |
| <b>SBP 130 to &lt;140 mm Hg or DBP 80 to &lt; 90 mm Hg</b>                                                       |                                   |                                                                |                                                                                             |                                |                                |
| Treatment intensification recommended by the 2017 ACC/AHA but not JNC8                                           | 11.3<br>(9.1-13.5)                | 2.0<br>(1.8-2.3)                                               | -                                                                                           | 0.3<br>(0.0-0.6)               | 0.3<br>(0.0-0.6)               |
| <b>SBP 140 to &lt;150 mm Hg or DBP 90 to &lt;95 mm Hg</b>                                                        |                                   |                                                                |                                                                                             |                                |                                |
| Treatment intensification recommended by the 2017 ACC/AHA and JNC8                                               | 4.3<br>(3.2-5.4)                  | 1.0<br>(0.9-1.2)                                               | 0.2<br>(0.0-0.4)                                                                            | 0.3<br>(0.1-0.5)               | 0.1<br>(0.1-0.2)               |
| Treatment intensification recommended by the 2017 ACC/AHA but not JNC8                                           | 2.1<br>(1.2-3.1)                  | 0.4<br>(0.3-0.5)                                               | -                                                                                           | 0.1<br>(0.0-0.2)               | 0.1<br>(0.0-0.2)               |
| <b>SBP <math>\geq</math>150 mm Hg or DBP <math>\geq</math> 95 mm Hg</b>                                          |                                   |                                                                |                                                                                             |                                |                                |
| Treatment intensification recommended by the 2017 ACC/AHA and JNC8                                               | 7.5<br>(5.1-9.9)                  | 2.2<br>(1.7-2.6)                                               | 0.8<br>(0.3-1.4)                                                                            | 1.1<br>(0.6-1.7)               | 0.3<br>(0.2-0.4)               |
| <b>Total</b>                                                                                                     | <b>47.6</b><br><b>(37.3-57.8)</b> | <b>9.4</b><br><b>(8.2-10.7)</b>                                | <b>1.0</b><br><b>(0.3-1.8)</b>                                                              | <b>1.9</b><br><b>(0.8-3.1)</b> | <b>0.8</b><br><b>(0.4-1.2)</b> |
| <b>Overall (Taking and not taking Antihypertensive Medication)</b>                                               |                                   |                                                                |                                                                                             |                                |                                |
| <b>Total</b>                                                                                                     | <b>121.4</b>                      | <b>16.2</b>                                                    | <b>1.5</b>                                                                                  | <b>3.0</b>                     | <b>1.4</b>                     |

(96.6-146.3)

(13.7-18.8)

(0.4-2.8)

(1.1-4.8)

(0.7-2.0)

---

ACC: American College of Cardiology; AHA: American Heart Association; BP: blood pressure; CKD: chronic kidney disease; CVD: cardiovascular disease; DBP: diastolic blood pressure; JNC8: Eighth Report of the Joint National Committee on Prevention, Detection, Evaluation, and Treatment of High Blood Pressure; SBP: systolic blood pressure.

Recommendations for antihypertensive medication by the 2017 ACC/AHA high blood pressure guideline but not JNC7 include adults without diabetes or CKD (1) age  $\geq 65$  years with SBP 130-139 mm Hg and, or (2) with SBP/DBP 130-139/80-89 mm Hg with a history of CVD or a 10-year predicted CVD risk  $\geq 10\%$  on the Pooled Cohort risk equations. Recommendations for antihypertensive medication by the 2017 ACC/AHA high blood pressure guideline and JNC7 include (1) SBP/DBP 130-139/80-89 mm Hg with diabetes or CKD, and (2) SBP/DBP  $\geq 140/80$  mm Hg. Recommendation for intensification of antihypertensive medication by the 2017 ACC/AHA high blood pressure guideline but not by JNC7 includes SBP 130-139 mm Hg without diabetes or CKD. Recommendations for intensification of antihypertensive medication by the 2017 ACC/AHA high blood pressure guideline and JNC7 include (1) SBP/DBP 130-139/80-89 mm Hg with diabetes or CKD, and (2) SBP/DBP  $\geq 140/80$  mm Hg.

UR: Uncertainty range. The uncertainty interval represents the upper and lower bound from the analysis of extremes sensitivity analysis where the number of cardiovascular disease events prevented is recalculated using the upper and lower confidence bounds of both treatment effect size magnitude in the trials meta-analysis<sup>15</sup> and REGARDS ten-year cardiovascular event rate.<sup>21-23</sup> The lower bound is calculated using the upper bound of the hazard ratio and the lower bound of the REGARDS ten-year cardiovascular event rate. The upper bound is calculated using the lower bound of the hazard ratio and the upper bound of the REGARDS ten-year cardiovascular event rate.

## REFERENCES

1. Howard VJ, Cushman M, Pulley L, Gomez CR, Go RC, Prineas RJ, Graham A, Moy CS and Howard G. The REasons for Geographic And Racial Differences in Stroke Study: objectives and design. *Neuroepidemiology*. 2005;25:135-43.
2. Safford MM, Brown TM, Muntner PM, Durant RW, Glasser S, Halanych JH, Shikany JM, Prineas RJ, Samdarshi T, Bittner VA, Lewis CE, Gamboa C, Cushman M, Howard V and Howard G. Association of race and sex with risk of incident acute coronary heart disease events. *JAMA*. 2012;308:1768-74.
3. Kurella Tamura M, Wadley V, Yaffe K, McClure LA, Howard G, Go R, Allman RM, Warnock DG and McClellan W. Kidney function and cognitive impairment in US adults: the REasons for Geographic And Racial Differences in Stroke (REGARDS) Study. *Am J Kidney Dis*. 2008;52:227-34.
4. Levey AS, Stevens LA, Schmid CH, Zhang YL, Castro AF, 3rd, Feldman HI, Kusek JW, Eggers P, Van Lente F, Greene T and Coresh J. A new equation to estimate glomerular filtration rate. *Ann Intern Med*. 2009;150:604-12.
5. Goff DC, Jr., Lloyd-Jones DM, Bennett G, Coady S, D'Agostino RB, Gibbons R, Greenland P, Lackland DT, Levy D, O'Donnell CJ, Robinson JG, Schwartz JS, Shero ST, Smith SC, Jr., Sorlie P, Stone NJ, Wilson PW, Jordan HS, Nevo L, Wnek J, Anderson JL, Halperin JL, Albert NM, Bozkurt B, Brindis RG, Curtis LH, DeMets D, Hochman JS, Kovacs RJ, Ohman EM, Pressler SJ, Sellke FW, Shen WK, Smith SC, Jr., Tomaselli GF and American College of Cardiology/American Heart Association Task Force on Practice G. 2013 ACC/AHA guideline on the assessment of cardiovascular risk: a report of the American College of Cardiology/American Heart Association Task Force on Practice Guidelines. *Circulation*. 2014;129:S49-73.
6. Stroke--1989. Recommendations on stroke prevention, diagnosis, and therapy. Report of the WHO Task Force on Stroke and other Cerebrovascular Disorders. *Stroke*. 1989;20:1407-31.

7. Thygesen K, Alpert JS, White HD, Jaffe AS, Apple FS, Galvani M, Katus HA, Newby LK, Ravkilde J, Chaitman B, Clemmensen PM, Dellborg M, Hod H, Porela P, Underwood R, Bax JJ, Beller GA, Bonow R, Van der Wall EE, Bassand JP, Wijns W, Ferguson TB, Steg PG, Uretsky BF, Williams DO, Armstrong PW, Antman EM, Fox KA, Hamm CW, Ohman EM, Simoons ML, Poole-Wilson PA, Gurfinkel EP, Lopez-Sendon JL, Pais P, Mendis S, Zhu JR, Wallentin LC, Fernandez-Aviles F, Fox KM, Parkhomenko AN, Priori SG, Tendera M, Voipio-Pulkki LM, Vahanian A, Camm AJ, De Caterina R, Dean V, Dickstein K, Filippatos G, Funck-Brentano C, Hellems I, Kristensen SD, McGregor K, Sechtem U, Silber S, Tendera M, Widimsky P, Zamorano JL, Morais J, Brener S, Harrington R, Morrow D, Lim M, Martinez-Rios MA, Steinhilber S, Levine GN, Gibler WB, Goff D, Tubaro M, Dudek D and Al-Attar N. Universal definition of myocardial infarction. *Circulation*. 2007;116:2634-53.
8. Luepker RV, Apple FS, Christenson RH, Crow RS, Fortmann SP, Goff D, Goldberg RJ, Hand MM, Jaffe AS, Julian DG, Levy D, Manolio T, Mendis S, Mensah G, Pajak A, Prineas RJ, Reddy KS, Roger VL, Rosamond WD, Shahar E, Sharrett AR, Sorlie P, Tunstall-Pedoe H, Epidemiology AHACo, Prevention, Committee AHAS, World Heart Federation Council on E, Prevention, European Society of Cardiology Working Group on E, Prevention, Centers for Disease C, Prevention, National Heart L and Blood I. Case definitions for acute coronary heart disease in epidemiology and clinical research studies: a statement from the AHA Council on Epidemiology and Prevention; AHA Statistics Committee; World Heart Federation Council on Epidemiology and Prevention; the European Society of Cardiology Working Group on Epidemiology and Prevention; Centers for Disease Control and Prevention; and the National Heart, Lung, and Blood Institute. *Circulation*. 2003;108:2543-9.
9. Prineas RJ, Crow RS and Blackburn HW. *The Minnesota code manual of electrocardiographic findings : standards and procedures for measurement and classification*. Boston, Mass.: J. Wright; 1982.

10. Soliman EZ, Howard G, Cushman M, Kissela B, Kleindorfer D, Le A, Judd S, McClure LA and Howard VJ. Prolongation of QTc and risk of stroke: The REGARDS (REasons for Geographic and Racial Differences in Stroke) study. *J Am Coll Cardiol.* 2012;59:1460-7.
11. Cooper R, Kuh D, Hardy R, Mortality Review G, Falcon and Teams HAS. Objectively measured physical capability levels and mortality: systematic review and meta-analysis. *BMJ.* 2010;341:c4467.
12. Odden MC, Peralta CA, Haan MN and Covinsky KE. Rethinking the association of high blood pressure with mortality in elderly adults: the impact of frailty. *Arch Intern Med.* 2012;172:1162-8.
13. Rothman MD, Leo-Summers L and Gill TM. Prognostic significance of potential frailty criteria. *J Am Geriatr Soc.* 2008;56:2211-16.
14. Purser JL, Kuchibhatla MN, Fillenbaum GG, Harding T, Peterson ED and Alexander KP. Identifying frailty in hospitalized older adults with significant coronary artery disease. *J Am Geriatr Soc.* 2006;54:1674-81.
15. Bundy JD, Li C, Stuchlik P, Bu X, Kelly TN, Mills KT, He H, Chen J, Whelton PK and He J. Systolic Blood Pressure Reduction and Risk of Cardiovascular Disease and Mortality: A Systematic Review and Network Meta-analysis. *JAMA Cardiol.* 2017;2:775-781.
16. Coresh J, Astor BC, McQuillan G, Kusek J, Greene T, Van Lente F and Levey AS. Calibration and random variation of the serum creatinine assay as critical elements of using equations to estimate glomerular filtration rate. *Am J Kidney Dis.* 2002;39:920-9.
17. LaVange LM, Stearns SC, Lafata JE, Koch GG and Shah BV. Innovative strategies using SUDAAN for analysis of health surveys with complex samples. *Stat Methods Med Res.* 1996;5:311-29.
18. Group SR, Wright JT, Jr., Williamson JD, Whelton PK, Snyder JK, Sink KM, Rocco MV, Reboussin DM, Rahman M, Oparil S, Lewis CE, Kimmell PL, Johnson KC, Goff DC, Jr., Fine LJ,



Cutler JA, Cushman WC, Cheung AK and Ambrosius WT. A Randomized Trial of Intensive versus Standard Blood-Pressure Control. *N Engl J Med.* 2015;373:2103-16.

19. Group AS, Cushman WC, Evans GW, Byington RP, Goff DC, Jr., Grimm RH, Jr., Cutler JA, Simons-Morton DG, Basile JN, Corson MA, Probstfield JL, Katz L, Peterson KA, Friedewald WT, Buse JB, Bigger JT, Gerstein HC and Ismail-Beigi F. Effects of intensive blood-pressure control in type 2 diabetes mellitus. *N Engl J Med.* 2010;362:1575-85.

20. Law M, Morris J and Wald N. Use of blood pressure lowering drugs in the prevention of cardiovascular disease: meta-analysis of 147 randomised trials in the context of expectations from prospective epidemiological studies. *Bmj.* 2009;338:b1665.

21. Chew DP, Huynh LT, Liew D, Astley C, Soman A and Brieger D. Potential survival gains in the treatment of myocardial infarction. *Heart.* 2009;95:1844-50.

22. Fonarow GC, Hernandez AF, Solomon SD and Yancy CW. Potential Mortality Reduction With Optimal Implementation of Angiotensin Receptor Neprilysin Inhibitor Therapy in Heart Failure. *JAMA Cardiol.* 2016;1:714-7.

23. Bress AP, Kramer H, Khatib R, Beddhu S, Cheung AK, Hess R, Bansal VK, Cao G, Yee J, Moran AE, Durazo-Arvizu R, Muntner P and Cooper RS. Potential Deaths Averted and Serious Adverse Events Incurred From Adoption of the SPRINT (Systolic Blood Pressure Intervention Trial) Intensive Blood Pressure Regimen in the United States: Projections From NHANES (National Health and Nutrition Examination Survey). *Circulation.* 2017;135:1617-1628.
